# Supplementary material
Source: Springer Nature journal article supplement (https://www.springermedizin.de/resource/supplementary/12889_2010_3250_MOESM2_ESM.pdf/9488714)
Supplement: MOESM2 [file 9488714]

| Interviewee       | Self medication | 1     | 2    | 3    | 4    | 5   | Time illness started | Time from symptom onset to diagnosis | Residence |
|-------------------|-----------------|-------|------|------|------|-----|----------------------|--------------------------------------|-----------|
| 1, Woman, age 27  | MS              | MHos  |      |      |      |     | 2001                 | 4 years                              | Asembo    |
| 2, Woman, age 30  | Herbs           | HC    |      |      |      |     | Apr-05               | 5 months                             | Asembo    |
| 3, Woman, age 23  |                 | Disp  | GDH  |      |      |     | Oct-04               | 11 months                            | Asembo    |
| 4, Woman, age 22  |                 | Disp  | GDH  |      |      |     | Apr-05               | 6 months                             | Gem       |
| 5, Woman, age 26  |                 | HC    | HC   | Disp | GDH  |     | 2003                 | 2 years                              | Gem       |
| 6, Woman, age 39  | Herbs           | GDH   | GDH  |      |      |     | 1996                 | 9 years                              | Asembo    |
| 7, Woman, age 45  | MS              | GDH   |      |      |      |     | Feb-05               | 7 months                             | Gem       |
| 8, Woman, age 22  | MS              | PC    | GDH  |      |      |     | Jun-05               | 3 months                             | Gem       |
| 9, Woman, age 21  | Herbs           | PDis  | PHos | HC   | GDH  |     | Jul-05               | 2 months                             | Gem       |
| 10, Woman, age 32 |                 | GDH   | PP   | GDH  |      |     | 1997                 | 8 years                              | Gem       |
| 11, Woman, age 30 | Spr /Healer     | GDH   | GDH  |      |      |     | 2002                 | 3 years                              | Gem       |
| 12, Woman, age 36 |                 | P Hos | HC   | GDH  |      |     | Sep-05               | 1 month                              | Gem       |
| 13, Woman, age 24 | Herbs           | P Hos | GDH  | GDH  |      |     | Jan-04               | 20 months                            | Gem       |
| 14, Woman, age 37 | Spr Healer      | P Hos | HC   | Disp | MHos |     | Apr-05               | 5 months                             | Asembo    |
| 15, Woman, age 24 | Herbs           | HC    |      |      |      |     | Jan-05               | 8 months                             | Gem       |
| 16, Woman, age 20 |                 | GDH   |      |      |      |     | Sep-05               | 0                                    | Gem       |
| 17, Woman, age 29 | Herbs           | HC    |      |      |      |     | Aug-05               | 1 months                             | Asembo    |
| 18, Woman, age 22 | Herbs           | PP    | GDH  |      |      |     | Jul-03               | 26 months                            | Gem       |
| 19, man, age 34   | Herbs/MS        | HC    |      |      |      |     | 2000                 | 5 years                              | Asembo    |
| 20, man, age 22   | MS              | PP    | Disp | HC   |      |     | Jul-05               | 2 months                             | Gem       |
| 21, man, age 33   | Herbs/MS        | PP    | GDH  |      |      |     | Jul-03               | 26 months                            | Gem       |
| 22, man, age 38   | Herbs           | GDH   | HC   | GDH  |      |     | 1998                 | 7 years                              | Gem       |
| 23, man, age 49   | MS              | GDH   |      |      |      |     | 2003                 | 2 years                              | Gem       |
| 24, man, age 39   | MS              | GDH   | NRF  | HC   | PP   | GDH | Dec-04               | 20 months                            | Gem       |
| 25, man, age 30   | MS              | PP    | HC   | GDH  |      |     | Nov-04               | 19 months                            | Gem       |
| 26, man, age 47   | MS              | PGH   | PGH  |      |      |     | Jul-05               | 2 months                             | Gem       |
| 27, man, age 46   |                 | GDH   |      |      |      |     | May-05               | 4 months                             | Gem       |
| 28, man, age 44   | Herbs           | PP    | Disp | GDH  |      |     | Aug-04               | 13 months                            | Asembo    |
| 29, man, age 52   |                 | HC    |      |      |      |     | Sep-05               | 0                                    | Asembo    |
| 30, man, age 24   | MS              | GDH   |      |      |      |     | Aug-05               | 1 month                              | Asembo    |
| 31, man, age 27   |                 | PP    | GDH  | HC   | GDH  |     | Jul-05               | 2 months                             | Asembo    |

  

|                                                                                                                             |                                                        |
|-----------------------------------------------------------------------------------------------------------------------------|--------------------------------------------------------|
| <span style="background-color: #FF00FF; border: 1px solid black; display: inline-block; width: 20px; height: 10px;"></span> | self medication                                        |
| <span style="background-color: #0000FF; border: 1px solid black; display: inline-block; width: 20px; height: 10px;"></span> | = indicates providers in the public healthcare sector  |
| <span style="background-color: #00FF00; border: 1px solid black; display: inline-block; width: 20px; height: 10px;"></span> | = indicates providers in the private healthcare sector |
